# Supplementary material
Source: JCI journal article supplement (doi:10.1172/jci199834)
Supplement: sd1 [file 1]

## SUPPLEMENTAL MATERIAL

### Reduced efficacy of an anti-toxin vaccine from senescence-driven attenuation of toxin virulence

**Authors:** Xin Du<sup>1,2§</sup>, Ching-Wen Tseng<sup>3,|| §\*</sup>, Elisabet Bjånes<sup>1,4</sup>, Hunter Gage<sup>1,4</sup>, Jaclyn Swan<sup>5</sup>, Chih-Ming Tsai<sup>1,2</sup>, Irshad Hajam<sup>1,2</sup>, Cesia Gonzalez<sup>1,2</sup>, Brian Lin<sup>1,2</sup>, Victor Nizet<sup>1,4</sup>, George Y Liu<sup>1,2\*</sup>

#### Affiliations:

<sup>1</sup>Department of Pediatrics, University of California San Diego, San Diego, California, United States.

<sup>2</sup>Division of Infectious Diseases, Rady Children's Hospital San Diego, San Diego, California, United States.

<sup>3</sup>Orca Bio, Menlo Park, California, United States.

<sup>4</sup>Department of Pharmacy, University of California San Diego, San Diego, California, United States.

<sup>5</sup>Department of Ecological Plant and Animal Sciences, La Trobe University, Melbourne, Australia.

§Equal contributions

||Former address: Department of Pediatric, Cedars-Sinai Medical Center, Los Angeles, California, United States.

\*Corresponding Author Email: [gyliu@ucsd.edu](mailto:gyliu@ucsd.edu); [dolorsas@gmail.com](mailto:dolorsas@gmail.com)

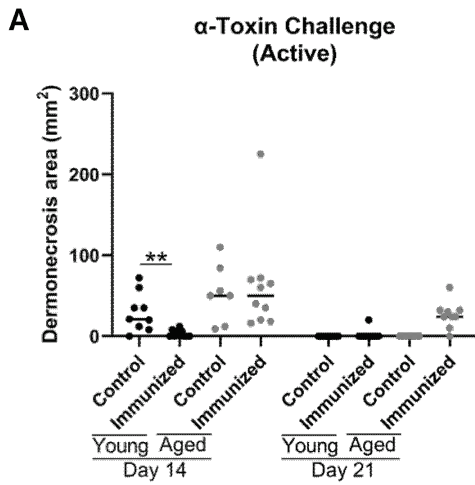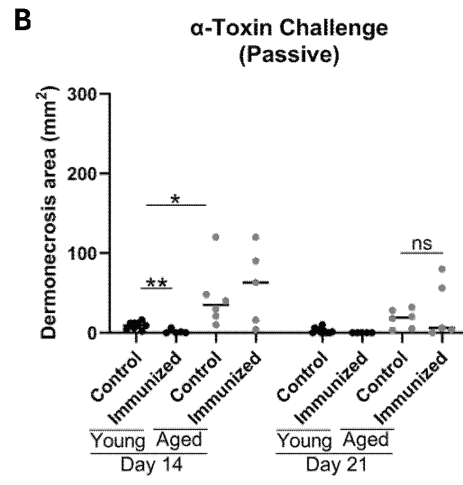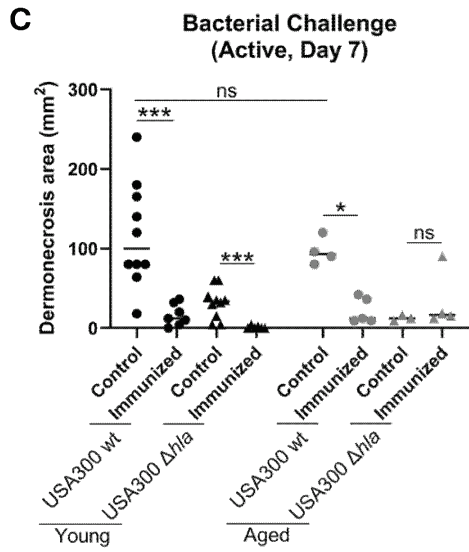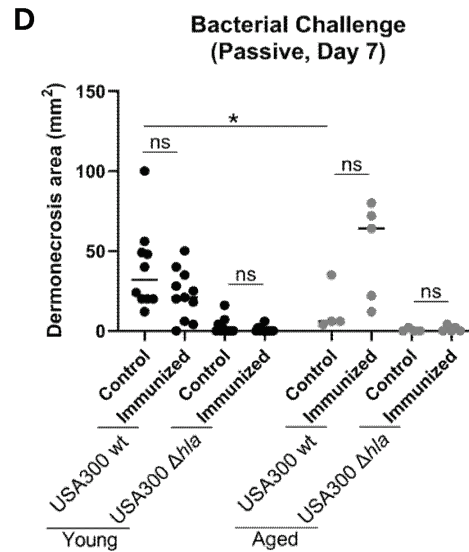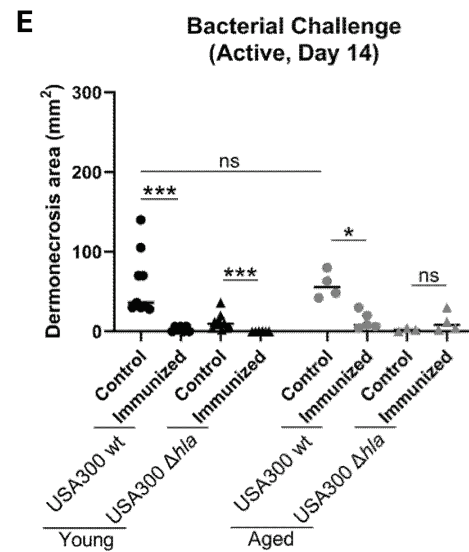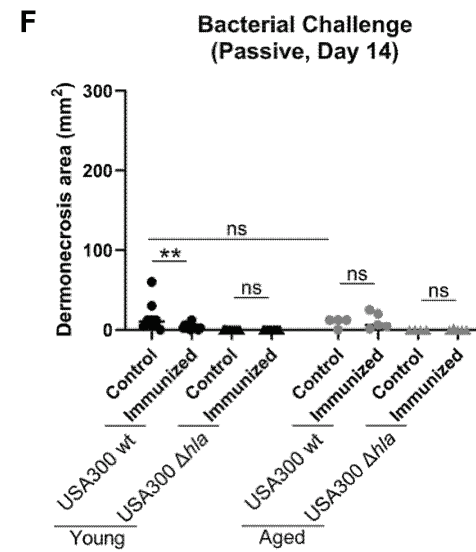

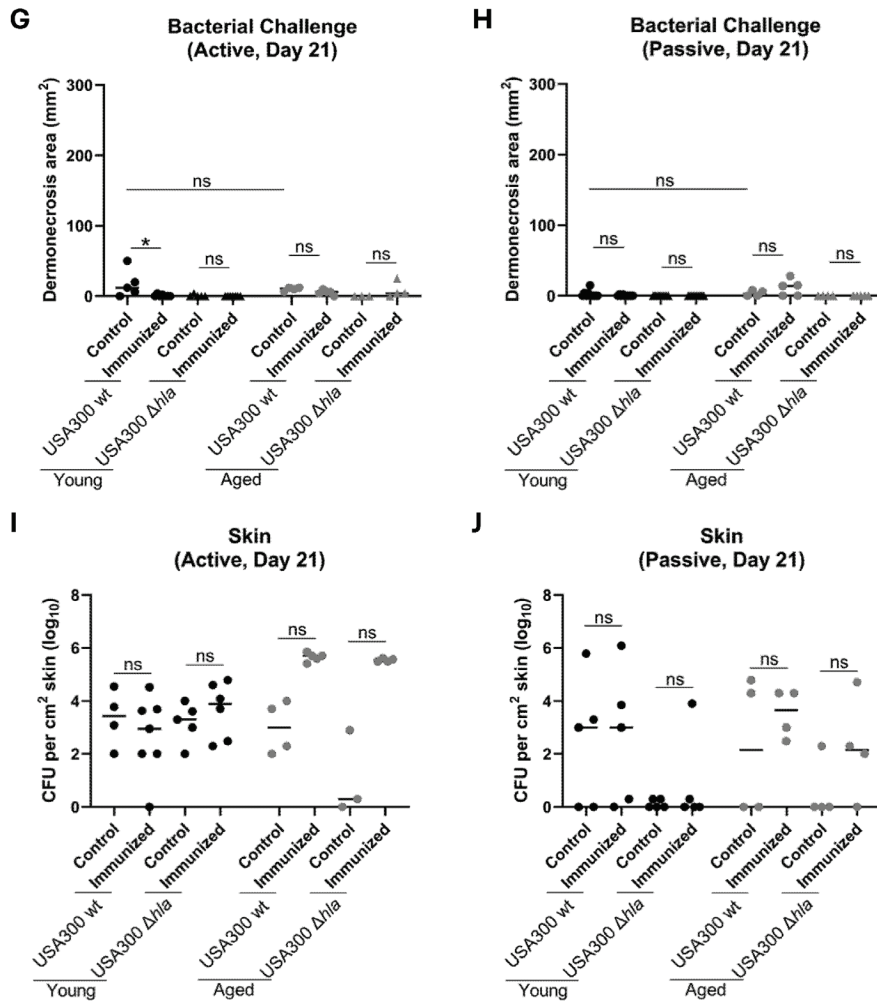

**Fig. S1. Quantitation of bacterial burden and skin lesions following anti-Hla immunization and Hla or *S. aureus* challenge of young and aged mice.** Young and aged mice were administered active or passive anti-Hla immunization then challenged subcutaneously with Hla or *S. aureus*. (A-B) Active and passive immunization - Skin lesion sizes 14 and 21 days after Hla challenge (n=5-9 mice). (C-D) Active and passive immunization - Skin lesion sizes 7 days after *S. aureus* infection (n=9-11 young, n=4-7 aged). (E-F) Active and passive immunization - Skin lesion sizes 14 days after *S. aureus* infection (n=9-11 young, n=4-7 aged). (G-H) Active and passive immunization - Skin lesion sizes 21 days after *S. aureus* infection (n=9-11 young, n=4-7 aged). (I-J) Active and passive immunization - Bacterial burden 21 days post-infection (n=4-6). Each data point represents an individual mouse. \*p < 0.05, \*\*p < 0.01, and \*\*\*p < 0.001; ns, not significant. Line represents mean. Kruskal-Wallis non-parametric one-way ANOVA test (A-J).

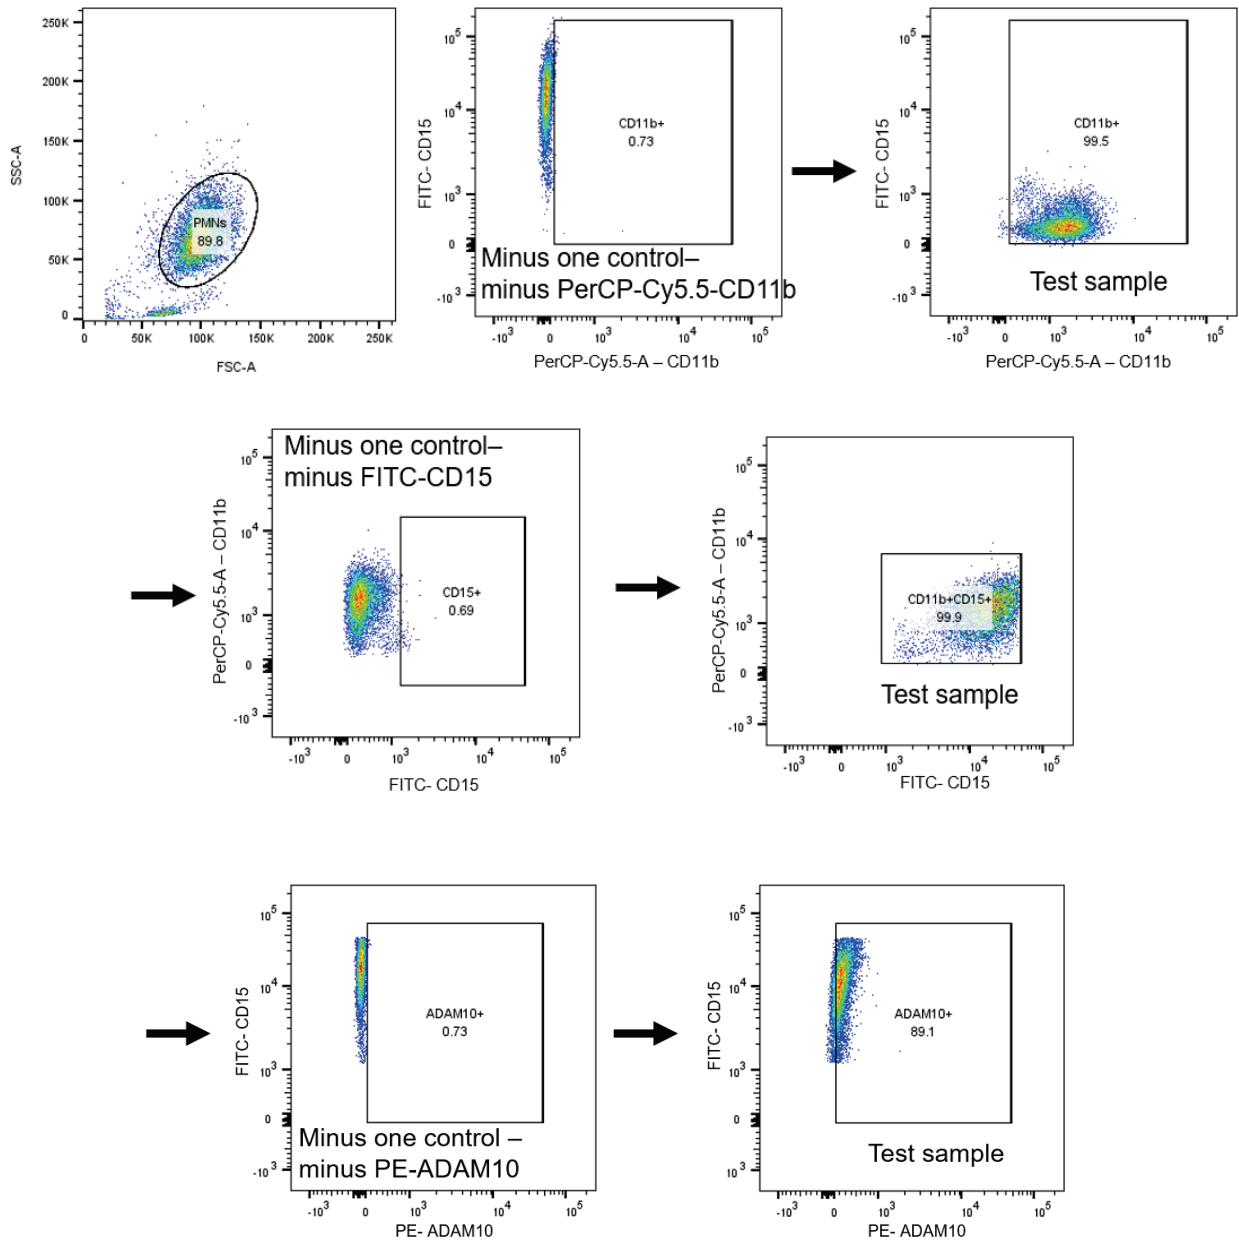

**Fig. S2. Flow Cytometer gating strategy for the assessment of ADAM10 expression on PMNs.** Neutrophils purified from young and aged healthy human volunteers were untreated or Hla pretreated for 30 minutes and stained with both fluorescence-conjugated antibodies against CD markers for neutrophils and ADAM10.

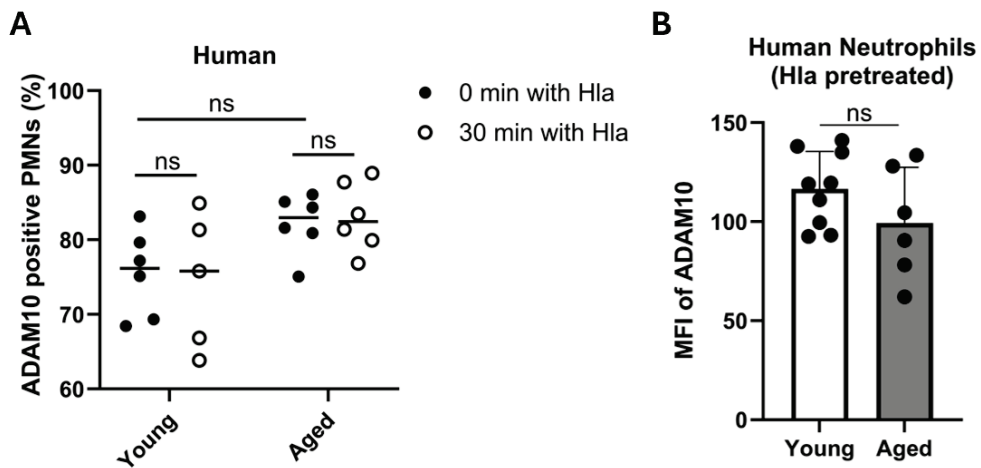

**Fig. S3. ADAM10 expression by human neutrophils following Hla treatment. (A)** Percentage of ADAM10-positive neutrophils 30 minutes after Hla treatment (n=5-6). **(B)** MFI of ADAM10 expression 30 minutes after Hla treatment (n=6). Line represents mean **(A)**; the data is presented as mean  $\pm$  SEM of biological replicates **(B)**. ns, not significant, Kruskal-Wallis non-parametric one-way ANOVA test **(A)**; two-tailed non-parametric Mann-Whitney U test **(B)**.

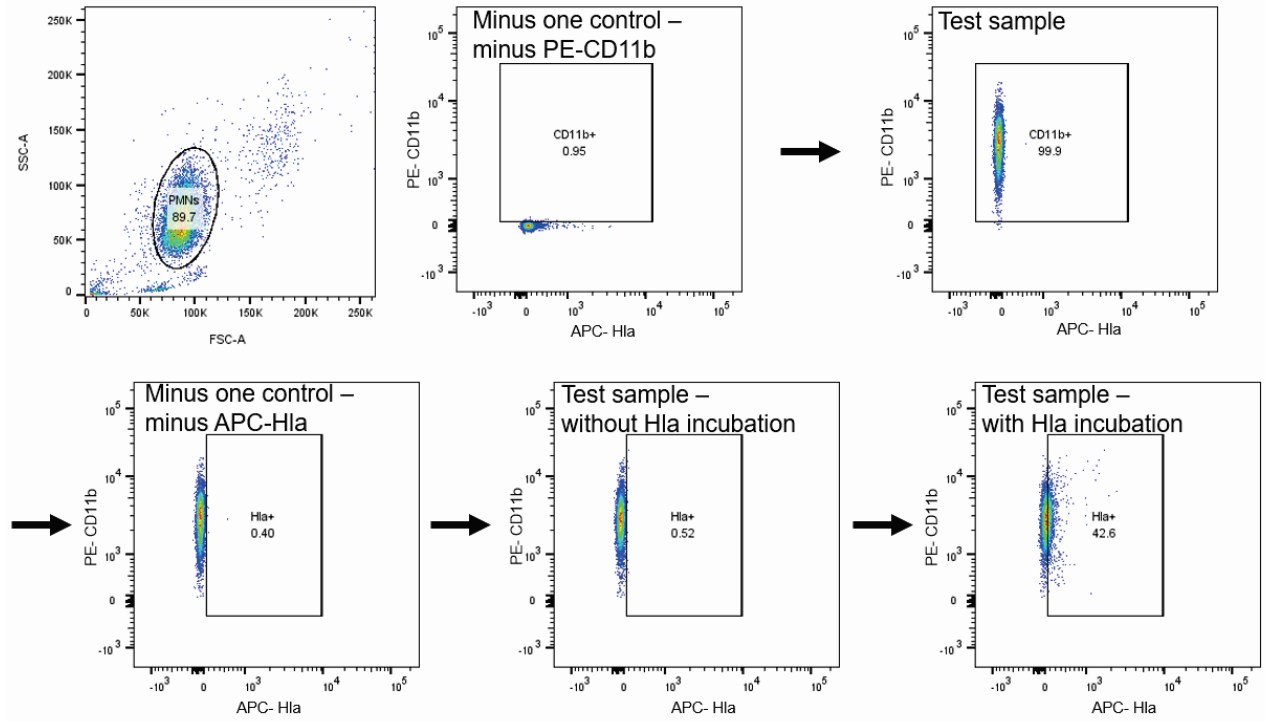

**Fig. S4. Flow Cytometer Gating Strategy for the assessment of Hla binding to PMNs.**

Neutrophils purified from young and aged human volunteers were untreated or pretreated with fluorescence-conjugated Hla for 15 minutes, then stained with fluorescence-conjugated antibody against the CD marker for neutrophils.

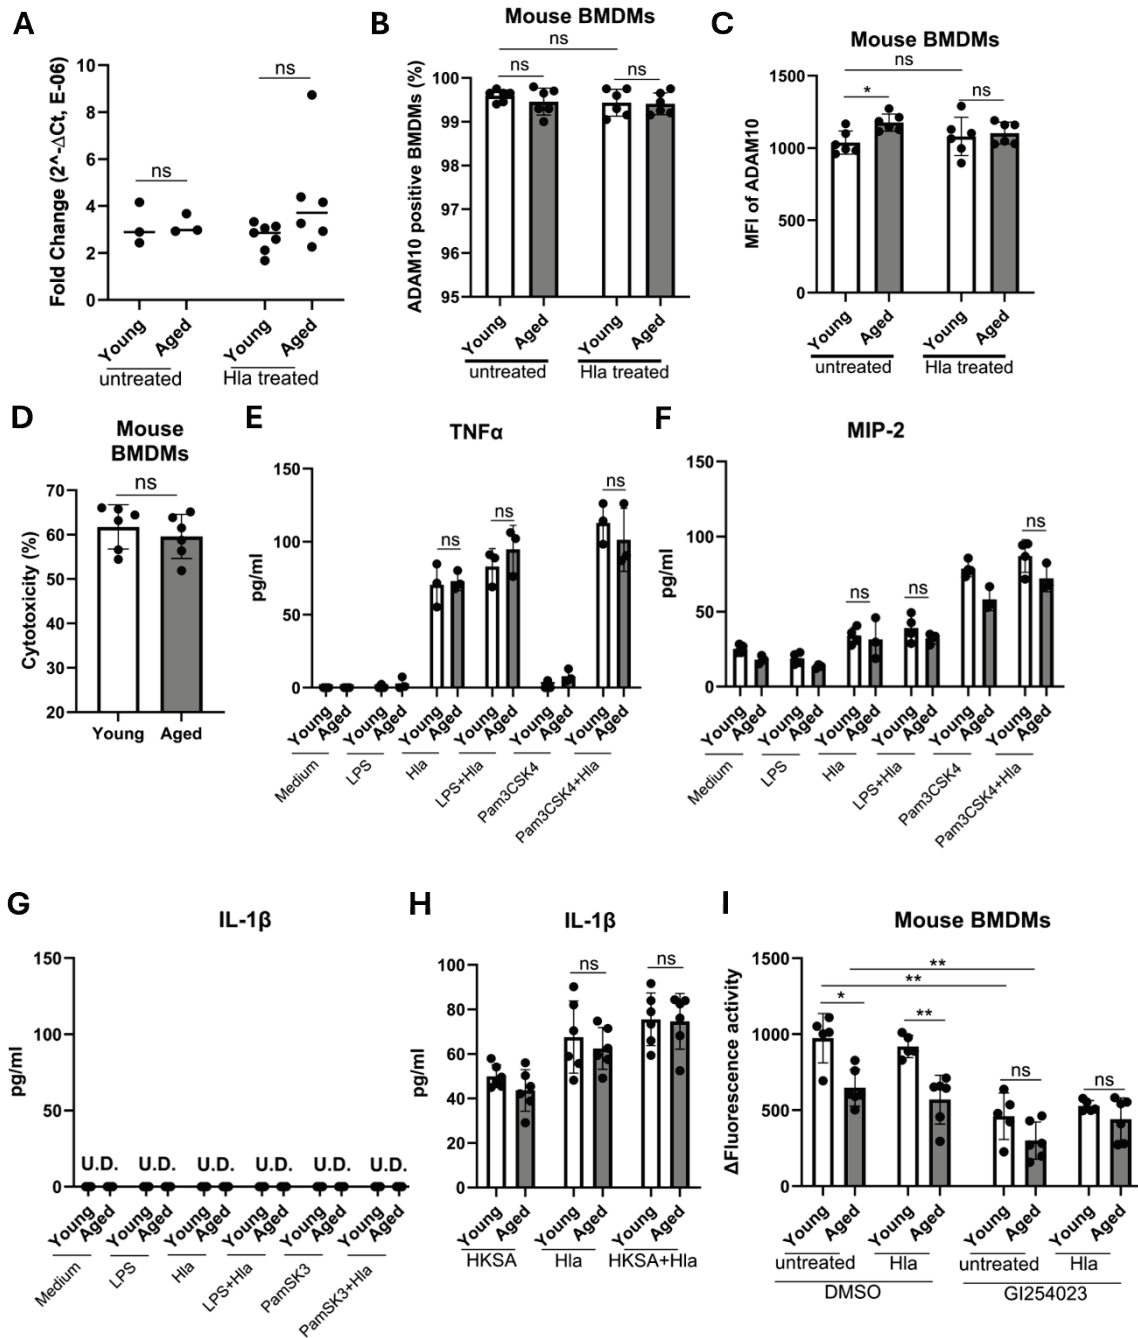

**Fig. S5. ADAM10 expression and enzymatic activity, and the proinflammatory effect of Hla on bone marrow-derived macrophages (BMDMs) from young and aged mice. (A)** ADAM10 mRNA expression in BMDMs from young and aged mice, treated with Hla, quantified by qPCR, and normalized to housekeeping gene expression. **(B-C)** ADAM10 expression measured with Flow Cytometry. Percentage of ADAM10-positive BMDMs **(B)** and mean

fluorescence intensity (MFI) of ADAM10 expression (**C**) assessed by flow cytometry in untreated or Hla-treated BMDMs from young and aged mice. (**D**) Hla (10 U/ml) lysis of BMDMs derived from young and aged mice assessed using LDH assay. Percent cell lysis in untreated controls – young 7.7, aged 7.6 (n=6 mice). (**E–G**) Cytokine production following Hla (10 U/ml) treatment measured by ELISA. TNF- $\alpha$  (**E**), MIP-2 (**F**), and (**G**) IL-1 $\beta$  production by BMDMs from young and aged mice following stimulation with medium, LPS, Hla (10 U/ml), or LPS plus Hla (10 U/ml), Pam3CSK4, or Pam3CSK4 plus Hla (10 U/ml). (**H**) IL-1 $\beta$  production by BMDMs from young and aged mice following stimulation with heat-killed SA  $\Delta hla$  (HKSA), Hla (250 U/ml), or HKSA plus Hla (250 U/ml). (**I**) Enzymatic activity of ADAM10 in lysates of BMDM from young and aged mice, measured using a fluorogenic substrate. The BMDMs were treated with DMSO vehicle or the ADAM10-specific inhibitor GI254023 dissolved in DMSO, with or without Hla (10 U/ml). Each data point represents an individual biological replicate. Data are presented as mean  $\pm$  SEM. Two-tailed non-parametric Mann-Whitney U test (**D–H**). Kruskal-Wallis non-parametric one-way ANOVA test (**A–C, I**). \*p < 0.05, \*\*p < 0.01; ns, not significant.

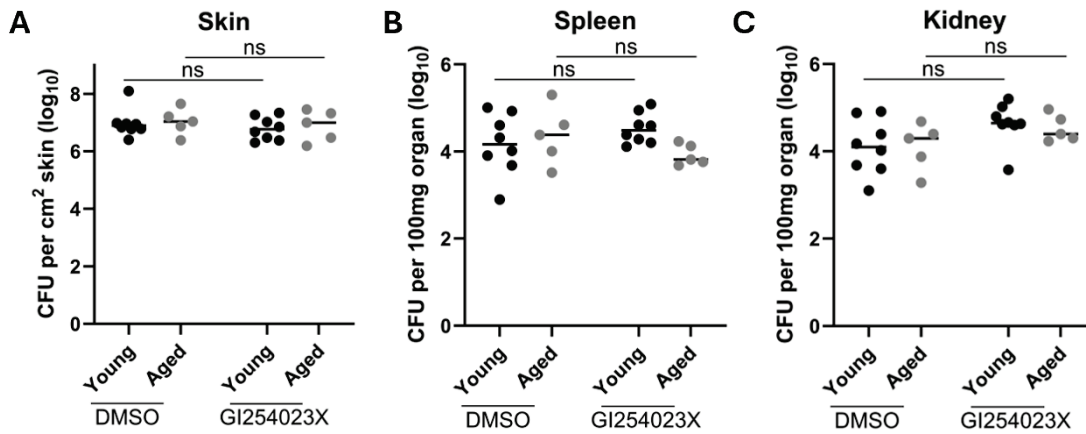

**Fig. S6. Bacterial burden in young and aged mice treated with ADAM10 inhibitor and challenged with *S. aureus*.** Young and aged mice were treated with DMSO carrier or ADAM10-specific inhibitor GI254023X, then challenged with WT *S. aureus*. Shown are bacterial burden from the skin (**A**), spleen (**B**), and Kidneys (**C**), 3 days post-infection. Line represents mean. Kruskal-Wallis non-parametric one-way ANOVA test (**A-C**). *S. aureus*: USA300 WT SF8300.

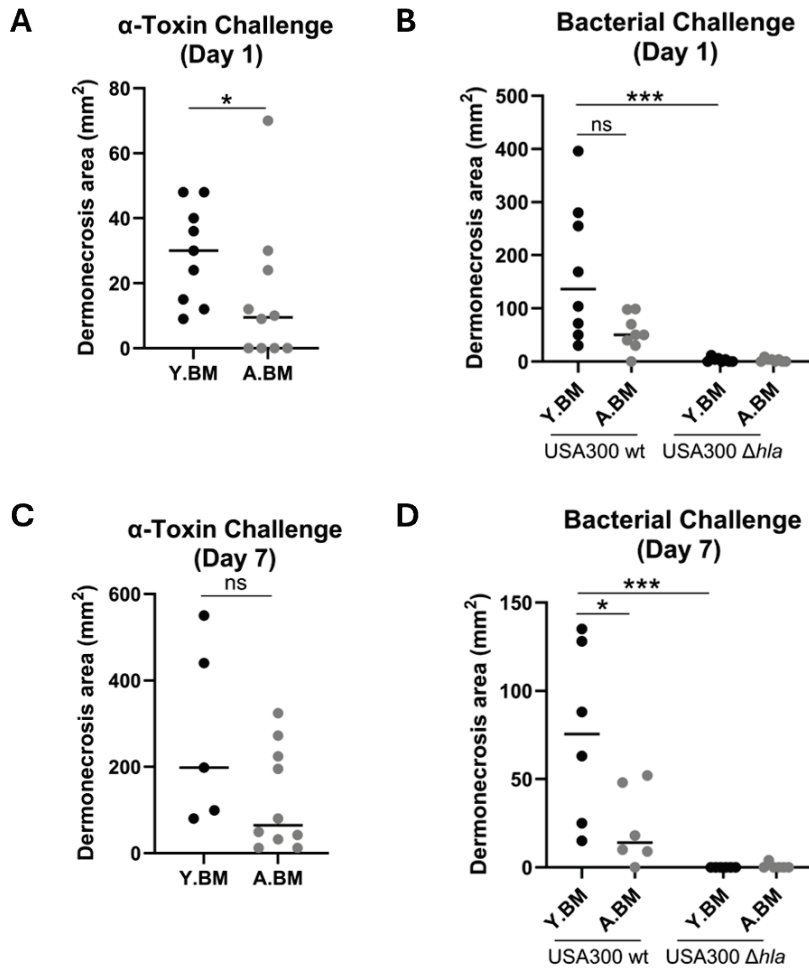

**Fig. S7. Quantitation of skin lesions after Hla or *S. aureus* challenge in recipients of young and aged bone marrow.** NSG mice received bone marrow from young or aged mice. At 16 weeks of age, the mice were challenged with Hla, WT or  $\Delta hla$  *S. aureus*. **(A-B)** Skin lesion sizes 1 and 7 days after Hla challenge. **(C-D)** Skin lesion sizes 1 and 7 days after *S. aureus* challenge. Line represents mean. \* $p < 0.05$ , \*\* $p < 0.01$ , and \*\*\* $p < 0.001$ ; ns, not significant. Two-tailed non-parametric Mann-Whitney U test **(A-D)**. Y.BM: NSG recipients of bone marrow from young C57BL/6 mice; A.BM: NSG recipients of bone marrow from aged C57BL/6 mice.
